# Supplementary material for: Performance of Polymerase Chain Reaction Analysis of the Amniotic Fluid of Pregnant Women for Diagnosis of Congenital Toxoplasmosis: A Systematic Review and Meta-Analysis
Source: PubMed Central journal article supplement (PMC4824461; doi:10.1371/journal.pone.0149938), 2016-04-07
Supplement: pone.0149938.s002.pdf [file pone.0149938.s002.pdf]

## Systematic review of PCR performance in amniotic fluid, for congenital toxoplasmosis diagnosis

| Section 1: Identifying text                                                                                                            |                                     |                  |
|----------------------------------------------------------------------------------------------------------------------------------------|-------------------------------------|------------------|
| 1. Identifier number:                                                                                                                  | 2. Name of reviewer:                |                  |
| 3. Date of review:                                                                                                                     | 4. First author's name:             |                  |
| 5. Year of publication:                                                                                                                | 6. Journal:                         |                  |
| 7. Volume:                                                                                                                             | 8. Number:                          | 9. Page (first): |
| Section 2: Eligibility full text                                                                                                       |                                     |                  |
| 10. This study approaches women who have suspected acute toxoplasmosis during pregnancy?                                               | 1. Yes 0.No<br>-7.No<br>information | P 10:            |
| 11. This study evaluates the accuracy of PCR in amniotic liquid?                                                                       | 1. Yes 0.No<br>-7.No<br>information | P 11:            |
| 12. This study evaluates the accuracy of PCR in cord blood?                                                                            | 1. Yes 0.No<br>-7.No<br>information | P 12:            |
| 13. This study evaluates the accuracy of PCR in maternal blood?                                                                        | 1. Yes 0.No<br>-7.No<br>information | P 13:            |
| 14. This study presents the outcome measures, sensitivity, specificity, predictive values?                                             | 1. Yes 0.No<br>-7.No<br>information | P 14:            |
| 15. This study compares the results of the PCR test with a reference test?                                                             | 1. Yes 0.No<br>-7.No<br>information | P 15:            |
| 16. This study is written in Portuguese, English, French, Spanish or Italian?                                                          | 1. Yes 0.No<br>-7.No<br>information | P 16:            |
| 17. This study was included for data extraction from full text?                                                                        | 1. Yes 0.No                         | P 17:            |
| Section 3: assessment of risk of bias by QUADAS 2                                                                                      |                                     |                  |
| <i>Regarding the selection of patients:</i>                                                                                            |                                     |                  |
| <b>A. Risk of bias</b>                                                                                                                 |                                     |                  |
| 18. The sample of patients was consecutive or random?                                                                                  | 1. Yes 0.No 9.It is not clear       | P 18:            |
| 19. A case-control design was avoided?                                                                                                 | 1. Yes 0.No 9.It is not clear       | P 19:            |
| 20. The study avoided inappropriate exclusions?                                                                                        | 1. Yes 0.No 9.It is not clear       | P 20:            |
| 21. What is the risk of selection of patients have introduced bias?                                                                    | 1. Yes 0.No 9.It is not clear       | P 21:            |
| <b>B. Concern about the applicability</b>                                                                                              |                                     |                  |
| 22. There is concern that the patients included did not correspond to the review question?                                             | 1.High 0.Low 9.It is not clear      | P 22:            |
| <i>As to the test index</i>                                                                                                            |                                     |                  |
| <b>A. Risk of bias</b>                                                                                                                 |                                     |                  |
| 23. The result of the index test was interpreted without knowledge of the results of the reference test?                               | 1. Yes 0.No 9.It is not clear       | P 23:            |
| 24. If a decision threshold (cutoff) was used, it was pre-specified?                                                                   | 1. Yes 0.No 9.It is not clear       | P 24:            |
| 25. What is the risk of the conduct or interpretation of the index test may have introduced bias?                                      | 1. Yes 0.No 9.It is not clear       | P 25:            |
| <b>B. Concern about the applicability</b>                                                                                              |                                     |                  |
| 26. There is concern that the index test, your driving, your interpretation is different from review of the matter?                    | 1.High 0. Low 9.It is not clear     | P 26:            |
| <i>As for the reference test</i>                                                                                                       |                                     |                  |
| <b>A. Risk of bias</b>                                                                                                                 |                                     |                  |
| 27. The standard reference test correctly classifies the condition of interest?                                                        | 1. Yes 0.No 9.It is not clear       | P 27:            |
| 28. The results of the reference test was interpreted without knowledge of the index test result?                                      | 1. Yes 0.No 9.It is not clear       | P 28:            |
| 29. What is the risk of the conduct or interpretation of the reference test have introduced bias?                                      | 1.High 0.Low 9.It is not clear      | P 29:            |
| <b>B. Concern as to the applicability</b>                                                                                              |                                     |                  |
| 30. There is concern that the condition of interest, as defined by the reference test does not correspond to question of the revision? | 1.High 0.Low 9.It is not clear      | P 30:            |
| <i>As the flow of patients and time</i>                                                                                                |                                     |                  |

| <b>A. Risk of bias</b>                                                                               |                                                            |                      |                     |
|------------------------------------------------------------------------------------------------------|------------------------------------------------------------|----------------------|---------------------|
| 31. There was an appropriate time interval between the index test and reference?                     | 1. Yes 0.No 9.It is not clear                              | P 31:                |                     |
| 32. All patients underwent a test reference?                                                         | 1. Yes 0.No 9.It is not clear                              | P 32:                |                     |
| 33. All patients were subjected to the same test reference?                                          | 1. Yes 0.No 9.It is not clear                              | P 33:                |                     |
| 34. All patients were included in the analysis?                                                      | 1. Yes 0.No 9.It is not clear                              | P 34:                |                     |
| 35. What is the risk of patient flow have introduced bias?                                           | 1.High 0.Low 9.It is not clear                             | P 35:                |                     |
| <b>Section 4: Characteristics of the study or sample</b>                                             |                                                            |                      |                     |
| 36. This study is a multicenter?                                                                     | 1. Yes 0.No 9.It is not clear                              | P 36:                |                     |
| 37. Nationality of volunteers or country where the research was conducted:                           | P 37:                                                      |                      |                     |
| 38. Average or median age of the sample of voluntary pregnant?                                       | P 38:                                                      |                      |                     |
| 39a. Proportion of pregnant women in the first trimester diagnosis of acute maternal toxoplasmosis:  | P 39a:                                                     |                      |                     |
| 39b. Proportion of pregnant women in the second trimester diagnosis of acute maternal toxoplasmosis: | P 39b:                                                     |                      |                     |
| 39c. Proportion of pregnant women in the third trimester diagnosis of acute maternal toxoplasmosis:  | P 39c:                                                     |                      |                     |
| 40. What is the average gestational age of acute maternal infection, in weeks?                       | P 40d:                                                     |                      |                     |
| 41. Was explicit assessment of research by research ethics committee?                                | 1. Yes 0.No -7.No information                              | P 41:                |                     |
| 42. Mean / Median time in weeks between diagnosis of maternal infection and fetal research:          | P 42:                                                      |                      |                     |
| 43. Proportion of pregnant women who received treatment for toxoplasmosis before fetal research:     | P 43:                                                      |                      |                     |
| 44. Average time / average between start of treatment for toxoplasmosis and fetal research:          | P 44:                                                      |                      |                     |
| 45. There is evidence that pretreatment of pregnant women influenced the result of the index test?   | 1. Yes 0.No -7.No information                              |                      |                     |
| 46. Ratio diagnosis of acute maternal infection IgM:                                                 | P 46:                                                      |                      |                     |
| 47. Proportion of diagnosis of acute maternal infection avidity test:                                | P 47:                                                      |                      |                     |
| 48. Proportion of diagnosis of acute infection by maternal fetal U.S.:                               | P 48:                                                      |                      |                     |
| 49. Proporção de diagnóstico da infecção aguda materna por PCR:                                      | P 49:                                                      |                      |                     |
| 50. Proportion of diagnosis of acute maternal infection clinic:                                      | P 50:                                                      |                      |                     |
| 51. Study of HIV-infected pregnant women:                                                            | 1. Yes 0.No -7.No information                              | P 51:                |                     |
| 52. Proportion of HIV-infected pregnant women in the sample:                                         | P 52:                                                      |                      |                     |
| <b>Section 5: Test data</b>                                                                          |                                                            |                      |                     |
| 53. Testing in-house?                                                                                | 1. Yes 0.No -7.No information                              | P 53:                |                     |
| 54. Name of the commercial test:                                                                     |                                                            |                      |                     |
| 55. Manufacturer of commercial test:                                                                 | 1. Yes 0.No -7.No information                              | P 55:                |                     |
| 56. Qualitative / Quantitative PCR                                                                   | 1. Qualitative 2. Quantitative                             | P 56:                |                     |
| 57. Name of the probe or primer:                                                                     | P 57:                                                      |                      |                     |
| 58. Amplified region:                                                                                | P 58:                                                      |                      |                     |
| 59. Reported detection limit and analytical sensitivity:                                             |                                                            |                      |                     |
| 60. Cutoff used in the test, if quantitative:                                                        |                                                            |                      |                     |
| 61. Biological sample used:                                                                          | 1. Amniotic fluid 2. Cord Blood 3. Maternal Blood 4. Other | P 61:                |                     |
| 62a. Test performance in the first quarter:                                                          | P 62a:                                                     |                      |                     |
| 62b. Test performance in the second quarter:                                                         | P 62b:                                                     |                      |                     |
| 62c. Test performance in the third quarter:                                                          | P 62c:                                                     |                      |                     |
| 63. This paper proposes a prediction model?                                                          | Yes 0.No -7.No information                                 |                      |                     |
| 64. Test used as reference:                                                                          | 1. Follow 2. Inoculation 3. Placenta 4. Other              | P 64:                |                     |
| 65. Sample size:                                                                                     |                                                            |                      |                     |
| 66a. True positive:                                                                                  | 66b. False Negative:                                       | 66c. False positive: | 66d. True negative: |

Notes:
